# Supplementary material
Source: PubMed Central journal article supplement (PMC10786498)
Supplement: media-1.pdf [file media-1.pdf]

# GeneMark-ETP: Automatic Gene Finding in Eukaryotic Genomes in Consistence with Extrinsic Data

Tomas Bruna <sup>1#</sup>, Alexandre Lomsadze <sup>2</sup> and Mark Borodovsky <sup>1,2,3</sup>.

1 School of Biological Sciences, Georgia Institute of Technology, Atlanta, GA 30332, USA

2 Wallace H. Coulter Department of Biomedical Engineering, Georgia Institute of Technology, Atlanta, GA 30332, USA

3 School of Computational Science and Engineering, Georgia Institute of Technology, Atlanta, GA 30332, USA

# current address: U.S. Department of Energy, Joint Genome Institute, Lawrence Berkeley National Laboratory, Berkeley, CA 94720, USA

## Supplemental Methods

### S1. GeneMarkS-TP: predicting genes in RNA transcripts with protein database support.

#### S1.1 Corrections of the 5' end gene predictions

First, the CDS prediction in assembled transcripts is done by GeneMarkS-T (Tang et al, 2015). We have observed that GeneMarkS-T made very few errors when predicting 5' complete genes, those with start codons within transcripts. On the other hand, the 5' incomplete genes predicted by GeneMarkS-T with the CDS start residing near the first nucleotide of a transcript, carry more frequent errors and should be corrected. We need to discriminate between a correctly predicted 5' incomplete CDS vs an incorrect 5' incomplete CDS with a true complete CDS residing inside.

Incomplete genes predicted by GeneMarkS-T in transcripts serve as queries in searches for homologous proteins (targets) in a reference protein database (e.g. by DIAMOND (Buchfink et al. 2015)). If among the similarity search hits (targets) exists at least one target that i/ is common for both queries and ii/ shows *better support* for the 5' partial gene, *the 5' partial gene is predicted*. Otherwise, the CDS starting with the internal ATG is selected as the *predicted complete gene*. If the sets of protein targets in the two searches (those with 25 best scores, the default setting) do not overlap, the 5' partial CDS is selected. If both similarity searches do not produce targets, the transcript is removed from consideration.

The quantitative meaning of the *better support* follows from analysis of alignment data in the form of the following condition:

$$(b - a) - (a - 1) > 1000 * \ln \frac{AAI_{complete}}{AAI_{partial}} \quad (S1)$$

Here  $a$  and  $b$  are the starting positions of the local alignments within the target protein for the longer and shorter protein queries respectively (Supplemental Fig. S3 and S4).  $AAI_{partial}$  and  $AAI_{complete}$  are, respectively, the percentages of *amino acid identities* in the alignments of the longer and shorter query proteins to the target protein.  $AAI_{partial}$  is defined within the range “ $a-c$ ”,  $AAI_{complete}$  is defined within the range “ $b-c$ ”, where  $c$  is the common end position of the two local pairwise alignments (Supplemental Figs. S3 and S4).

If condition (S1) is fulfilled, the longer query is selected, the 5' partial gene.

If condition (S1) is not fulfilled, the shorter query, a *complete* gene is selected.

Notably, “ $a-1$ ” is the length of unaligned N proximal part of the long query.

A large “ $a-1$ ” is likely to indicate a presence of translated 5' UTR region situated upstream to a complete gene. A small “ $b-a$ ” indicates that an extension of the complete gene candidate does not extend the zone of two proteins similarity, again a support of the complete gene prediction.

The larger value of the *AAI* ratio the more conservation exists between query and target protein subsequences in the range “ $b-a$ ”. Therefore, the increase of the *AAI* ratio favors the 5' partial candidate. The *AAI* ratio is scaled by using logarithm with a factor 1,000, i.e.  $1,000 \cdot \log(\dots)$ .

### **S1.2 Removal of the 3' partial gene predictions**

The 3' partial predictions were rarely observed. This frequency pattern could be expected since RNA-Seq libraries used in our experiments, prepared with the poly-A tail enrichment of mRNA transcripts, should predominantly carry transcripts complete at 3' end (Zhao et al. 2014). This consideration justifies the removal of all the 3' partial genes from the list of candidates for high-confidence genes.

### **S1.3. Extensions of GeneMarkS-T gene predictions to the longest ORFs**

Most eukaryotic genes are translated from the ATG start codon closest to the transcript 5' end (Kozak 1999). Still, the translation can be initiated at one of the downstream ATG starts; e.g., when the most upstream start has a weak translation initiation signal known as the Kozak pattern (Kozak 1987). GeneMarkS-T computes Kozak pattern score (with respect to the model with parameters derived in species-specific self-training) to account for the possibility of non-5'-most translation start codons. However, the Kozak pattern is relatively weak. We have observed that the gene predictions with non-5'-most start codons carry a higher false-positive rate than the predictions with 5'-most start codons. Therefore, GeneMark-ETP uses the following rule. If a gene predicted in a transcript could be extended to the 5'-most start codon, and the translation of this extension is supported by alignment to a target protein, the extended version of the predicted gene is considered as a candidate for an HC gene along with the one with non-5'-most start.

#### S1.4 Complete genes with uniform protein support

In the considered above similarity searches we have dealt with local pairwise alignments. Still, being interested in accurate prediction of all protein-coding exons, we are concerned about a *uniform* protein support showing evolutionary conservation over the whole protein-coding region. We say that a *uniform protein support* exists for a predicted *complete* gene if there is a significant BLASTp alignment (with E-value better than  $10^{-3}$ ) of the translation of the predicted gene  $Q$  to a protein in a database  $T$  and the following condition is satisfied:

$$(|Q_{start} - T_{start}| \leq 5) \wedge (|(Q_{len} - Q_{end}) - (T_{len} - T_{end})| \leq 20) \quad (S2)$$

Here,  $Q_{start}, Q_{end}, (T_{start}, T_{end})$  are, respectively, the positions of the start and end of the alignment within the query protein (within the target protein);  $Q_{len}, T_{len}$  are the lengths of the query and target proteins, respectively (Supplemental Fig. S5).

Experiments with multiple sequence alignments (MSA) of orthologous proteins demonstrated that internal sections of MSA were usually most conserved, while the N-proximal regions of the proteins were less conserved and the least conserved regions in MSA were usually C-proximal regions. Therefore, testing for conservation of the N- and C- proximal regions provided sufficient evidence of evolutionary conservation across the pair of proteins. Condition S2 allows some misalignment at the alignment start and even to a larger degree at the alignment end. A gene prediction is called a complete gene with uniform protein support if a query complete protein has an alignment to at least one target (out of the best scored 25, the default setting) that satisfies condition S2. All such predicted genes are included in the set of high-confidence gene predictions.

#### S1.5 Tests of conditions S1 and S2

To assess the degree of improvement in the quality of gene sets selected with conditions S1 and S2, we used the following approach. We have prepared test sets of transcript sequences with complete and partial genes. The ground-truth labels were determined from reference annotations. GeneMarkS-T was run on these sequences. Next, for each transcript, the alignments of the longer and shorter queries with the target proteins were made and the features used in conditions S1 and S2 were selected. We assessed the efficiency of the empirical rules for selecting partial and complete genes (condition S1) as well as selecting genes with uniform protein support (conditions S2) with efficiency of two other possible approaches. We trained random forest and logistic regression classifiers (with Python's scikit-learn machine learning library) using all alignment features offered by DIAMOND's tabular output (Buchfink et al. 2015) i/ to classify gene predictions as complete or partial (compared to the use of condition S1), ii/ to claim uniform protein support (compared to the use of condition S2). The training sets for the two ML methods did not overlap with the test set. We observed that use of conditions S1 and S2 produced more accurate results than the results generated by application of general-purpose random forest or logistic regression models (data not shown).

## S2. ProtHint filter for high-confidence gene candidates (in the *ab initio* category)

Some GeneMarkS-T gene predictions not uniformly supported by proteins (and not satisfying Condition S2) still could be included in the set of HC genes. Such predictions should satisfy several conditions (see Main text), one of which is no contradiction to the ProtHint hints. To detect such a conflict, we proceed as follows. First, a gene predicted by GeneMarkS-T is mapped to a particular locus of genomic DNA. Second, the translation of the initially predicted gene and its genomic locus is used by ProtHint as the protein and gene seeds to generate hints for the next round of gene prediction in the same locus (Bruna et al. 2020). Next, the borders of the thus determined exons are compared to the ProtHint hints. We say that the contradiction exists if (i) at least one of ProtHint's introns overlaps a mapped exon, or (ii) a ProtHint defined stop codon overlaps an exon or intron of the mapped gene, or (iii) a ProtHint start codon overlaps an exon or intron of the mapped gene (except the start-to-start overlap).

## S3. Alternative HC isoforms

An additional round of selection is made to filter out possible false positives among HC isoforms. Here we consider the HC isoforms that satisfy Condition S2. Let  $I_{complete}^g$  be a set of complete isoforms of gene  $g$  and  $I_{partial}^g$  is a set of its partial isoforms. Each isoform  $i$  is assigned a score  $s(i)$  -- the *bitscore* of its best hit to a protein in the protein database. We compute the maximum score of all the complete isoforms for a gene  $g$ , denoted as  $s(g_{complete})$ . A score of an isoform  $s(i)$  selected as complete HC isoform must satisfy the inequality:

$$s(i) \geq 0.8 \times s(g_{complete}) \quad (i \in I_{complete}^g) \quad (S3)$$

Among the partial alternative isoforms of gene  $g$ , we determine the maximum score  $s(g_{partial})$ . If  $s(g_{partial})$  is larger than  $s(g_{complete})$ , the partial isoform with this largest score is selected as the partial HC isoform. In this case, all the complete HC isoforms are removed. Otherwise, if  $s(g_{partial})$ , is lower than  $s(g_{complete})$ , then only complete HC isoforms of gene  $g$  are retained.

If all alternative HC candidates were defined *ab initio*, then the one with the longest protein-coding region is selected as the predicted HC gene.

## S4. Computing the species-specific repeat penalty parameter

For each genome, after identification of the HC genes and the first iteration of the GHMM model training, we estimate species-specific parameter  $q$ .

We have the set of the HC genes, the first version of the full GHMM model, and the coordinates of the repeats identified in genomic DNA. GeneMark.hmm is run several times with different  $q$  values to predict genes in the genomic sequences containing the HC genes for which we compute the gene level F1 value (Supplemental Fig. S7-A). The value  $q$  delivering the F1 maximum was chosen as the species-specific repeat penalty. We have shown that this value is close to  $q$  found when the test set of genes is made based on genome annotation. We also observed that the value  $q$  was robust with respect to the size of the HC genes set (data not shown).

Moreover, we have found that the use of the exon level Sn led to more robust estimation of  $q$  in comparison with use of the gene level F1 (data not shown). Practically, we first find the  $q'$  value maximizing the number of correctly predicted exons in the set of HC genes,  $e_{max}$  (Supplemental Fig. S7-B). Then, the value  $q^*$  at which  $0.998 \times e_{max}$  exons are correctly predicted (marked for *A. thaliana* and *D. melanogaster* in panel A of Supplemental Fig. S7-A) is selected as  $q$ . To reduce the runtime of the repeat penalty parameter estimation we use simulated annealing (Kirkpatrick et al. 1983).

## S5. Data sets used in computational experiments with MAKER2

Three model organisms representing three different types of genome organization were selected:

- *Drosophila melanogaster* – compact GC homogeneous genome.
- *Danio rerio* – large GC homogenous genome
- *Mus musculus* – large GC heterogeneous genome

The following information was provided to MAKER2.

Repeat coordinates predicted by RepeatMasker software were reformatted to MAKER2 supported GFF format as:

```
rmasker_out2maker_gff.pl < genome.fasta.out > repeatmasker.gff
```

Transcripts assembled in GeneMark-ETP runs from RNA-Seq by HISAT2/StringTie2 were provided as transcriptome input to MAKER2.

Proteins from the following species in OrthoDB were used as input to MAKER2 and GeneMark-ETP.

For *Drosophila melanogaster* 274,283 proteins from:

*Drosophila ananassae*  
*Drosophila biarmipes*  
*Drosophila bipectinate*  
*Drosophila busckii*  
*Drosophila elegans*  
*Drosophila erecta*  
*Drosophila eugracilis*  
*Drosophila ficusphila*  
*Drosophila grimshawi*  
*Drosophila hydei*  
*Drosophila mojavensis*  
*Drosophila obscura*  
*Drosophila pseudoobscura*  
*Drosophila rhopaloo*

*Drosophila serrata*  
*Drosophila takahashii*  
*Drosophila virilis*  
*Drosophila willistoni*  
*Drosophila yakuba*

For *Danio rerio* 181,842 proteins from:

*Cyprinus carpio*  
*Sinocyclocheilus anshuiensis*  
*Sinocyclocheilus bahari*  
*Sinocyclocheilus rhinoceros*

For *Mus musculus* 207,553 proteins from:

*Cavia porcellus*  
*Cricetulus griseus*  
*Fukomys damarensis*  
*Ictidomys tridecemlineatus*  
*Marmota marmota marmota*  
*Mesocricetus auratus*  
*Mus caroli*  
*Mus bahari*  
*Octodon degus*  
*Rattus norvegicus*

MAKER2 was executed with the gene finders AUGUSTUS, GeneMark.hmm and SNAP.  
The following model files were used by the gene finders:

For *Drosophila melanogaster*:

AUGUSTUS – “fly” from AUGUSTUS distribution.  
GeneMark.hmm – model created by GeneMark-ETP.  
SNAP – “D.melanogaster.hmm” from SNAP distribution.

For *Danio rerio*:

AUGUSTUS – the “zebrafish” model from the AUGUSTUS distribution.  
GeneMark.hmm – the model created by GeneMark-ETP.  
SNAP – the model trained according to instructions from the SNAP distribution. The training set matched the test set used for evaluation of the MAKER2 performance. All other training steps were done using scripts from the SNAP distribution.

For *Mus musculus*:

AUGUSTUS – the “human” model from the AUGUSTUS distribution.  
GeneMark.hmm – the medium GC model created by GeneMark-ETP on the mouse genome.  
SNAP – the “mam46.hmm” mammalian model for medium GC bin from SNAP distribution.

MAKER2 was executed with the following setting in the MAKER2 configuration file:  
genome=genome.fasta

```
est=transcriptome.fasta
protein=proteindb.fasta
model_org= #empty
rm_gff=repeatmasker.gff
snaphmm=snap.model
gmhmm=genemark.mod
augustus_species=model_name
est2genome=1
protein2genome=1
alt_splice=1
always_complete=1
keep_preds=1 for D. melanogaster
keep_preds=0 for D. rerio and M. musculus
split_hit=20000
max_dna_len=1000000
```

MAKER2 was executed on Azure cloud LINUX node with 96 cores in MPI mode.

The gene prediction accuracy of MAKER2 and GeneMark-ETP (shown in Supplemental Table S6) was estimated as described in the main text.

## Supplemental Figures

Supplemental Figures 1Sa-1Sg extend the flowchart of GeneMark-ETP shown in Fig. 1.

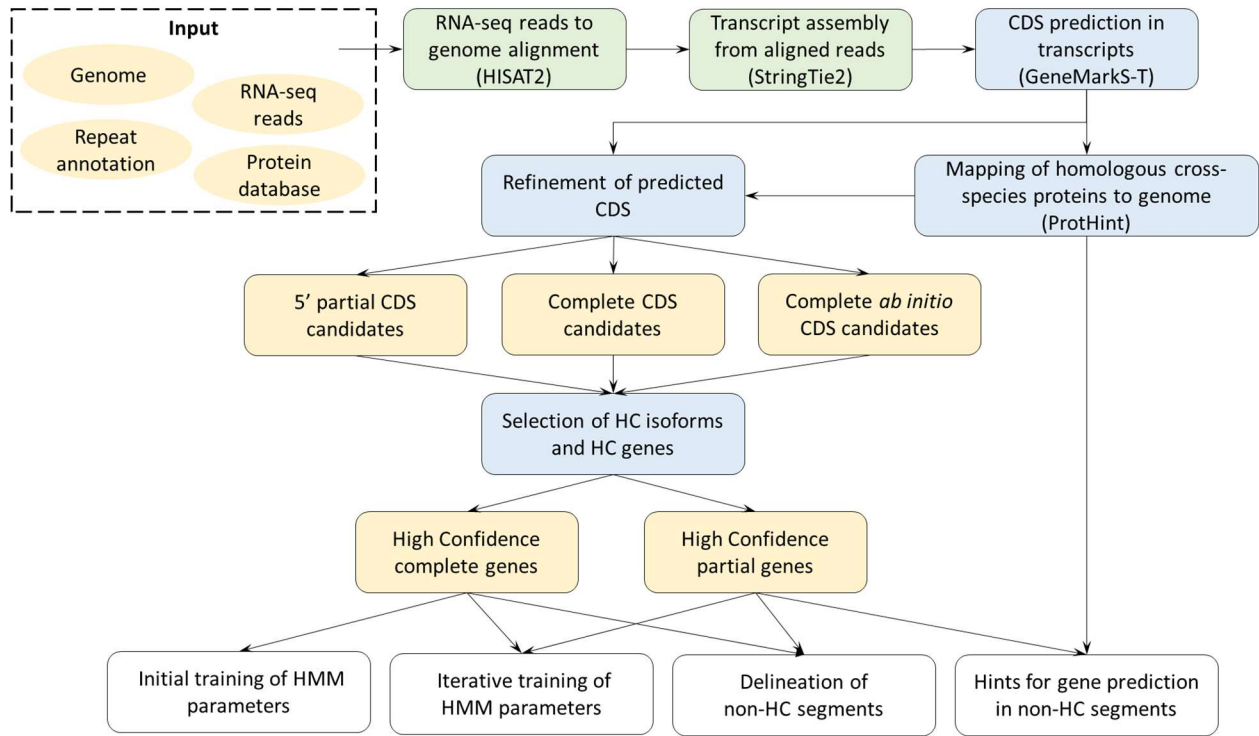

**Supplemental Figure S1A.** A high-level diagram illustrates the high-confidence (HC) gene identification procedure. Additional details are shown in Supplemental Figs. S1B-S1D.

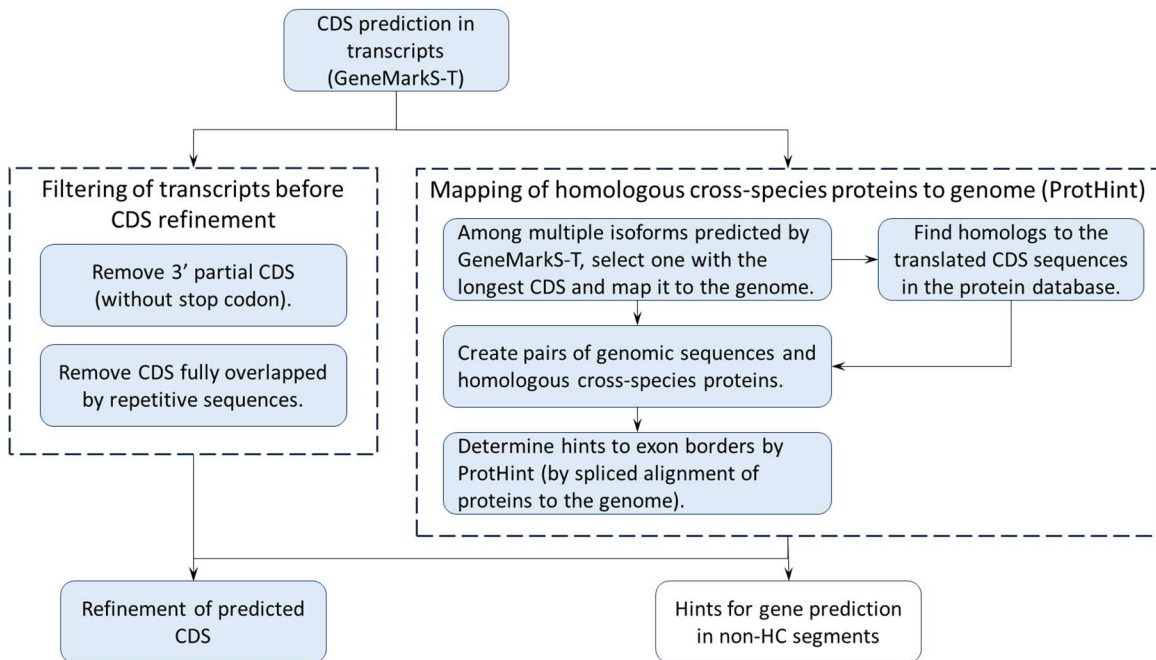

**Supplemental Figure S1B.** Details of the transcript processing.



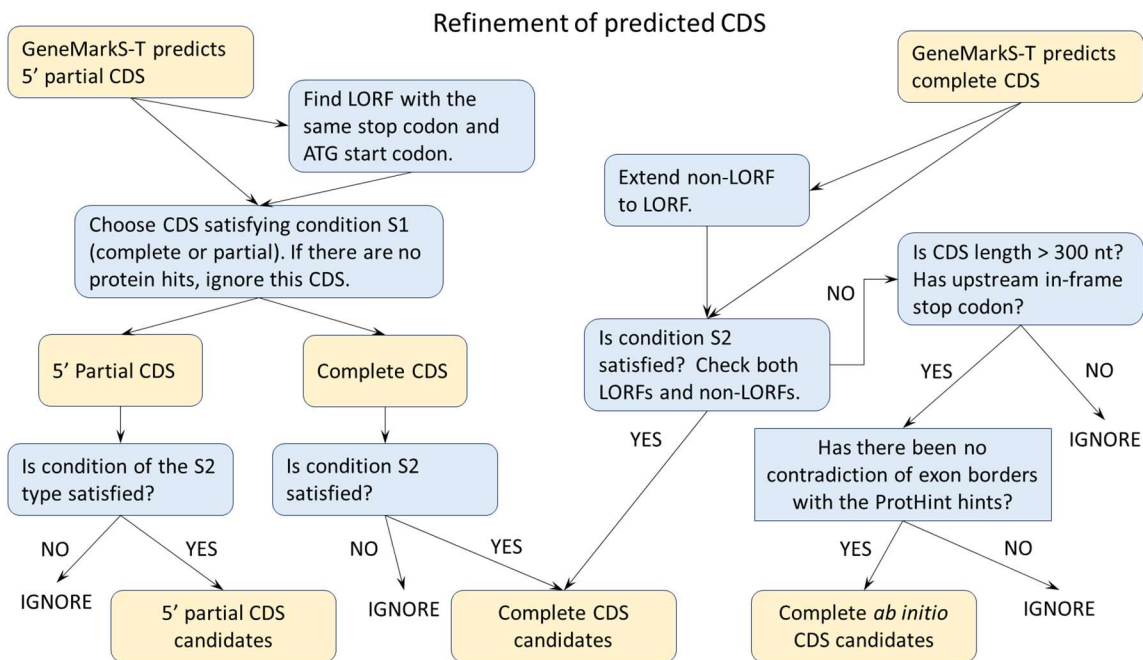

**Supplemental Figure S1C.** HC gene candidate generation procedure (refinement block in Supplemental Fig. S1A).

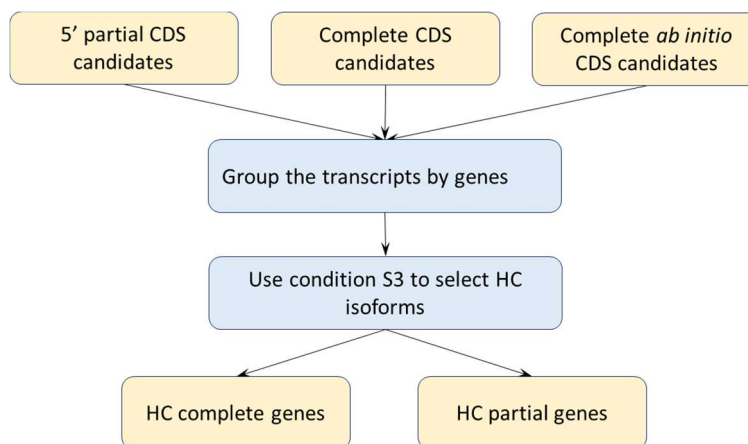

**Supplemental Figure S1D.** Details on the selection of HC genes and isoforms.

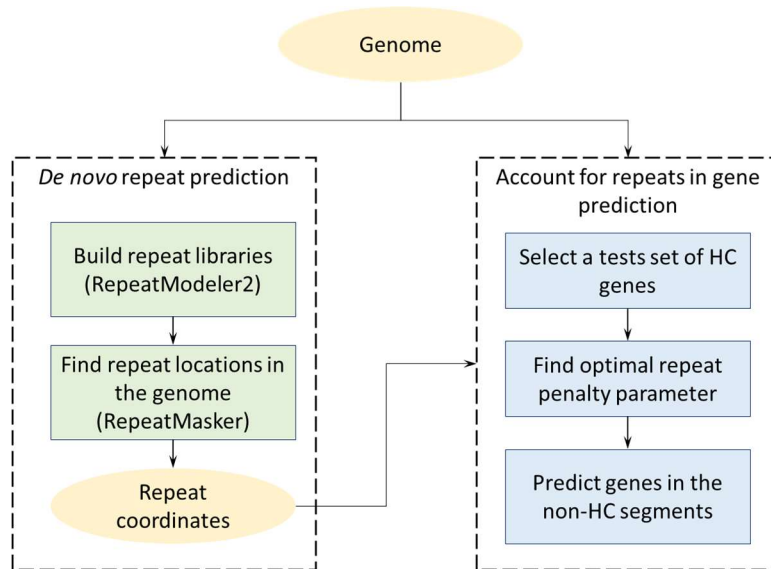

**Supplemental Figure S1E.** Details on the repetitive sequence identification and processing. *De novo* repeat prediction block is not included in GeneMark-ETP.

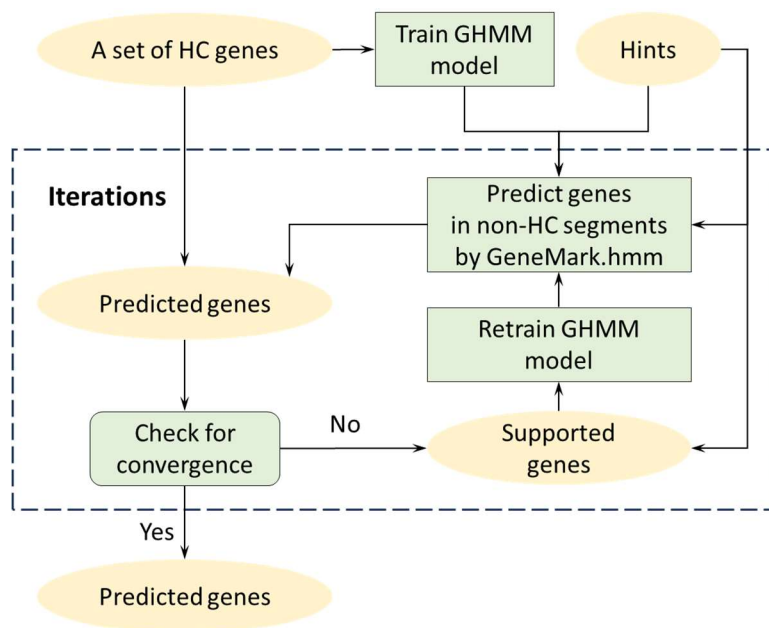

**Supplemental Figure S1F.** Workflow of the GHMM model training procedure for the GeneMark.hmm algorithm in GeneMark-ETP.

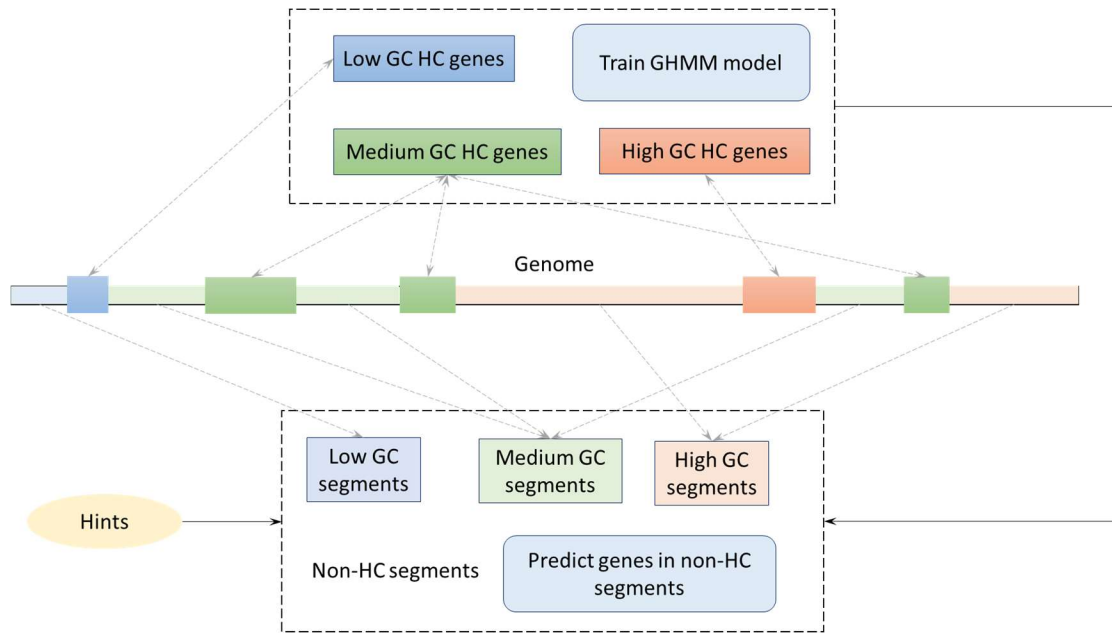

**Supplemental Figure S1G.** Schematics of the identification and use of the non-HC segments in training and gene prediction.

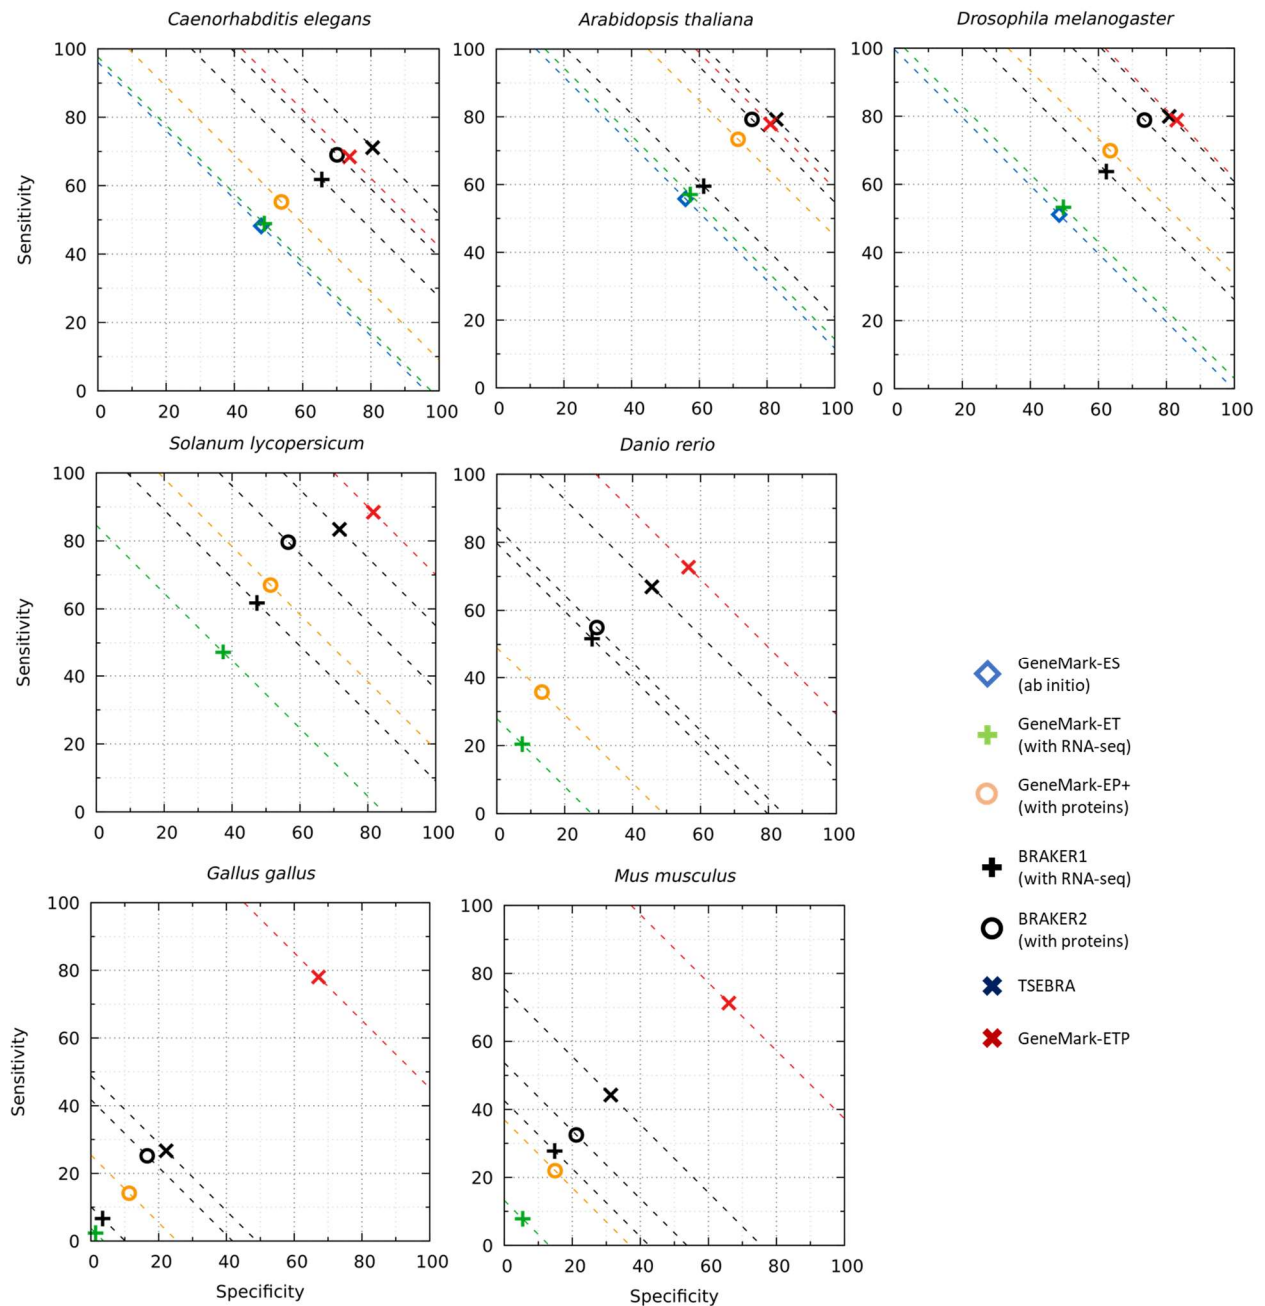

**Supplemental Figure S2.** Gene level accuracy of the seven gene prediction tools (see legends to Figs. 3-4). Compared to the figures in the main text, where we used smaller-size reference protein databases for each species (all proteins of the same taxonomic order were excluded from the corresponding IP<sub>0</sub> databases), here we used larger-size databases (proteins from the same species excluded from the corresponding IP<sub>0</sub> databases).

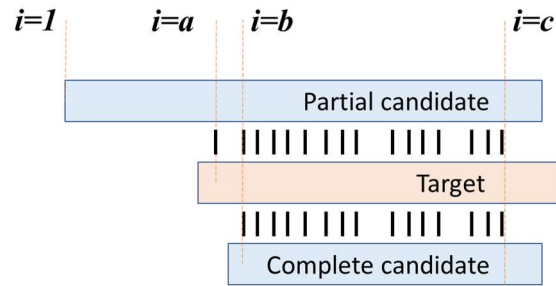

**Supplemental Figure S3.** The GeneMarkS-T gene prediction to be classified as a *complete gene*. Condition S1 is not fulfilled. Here  $a$ ,  $b$  and  $c$  are defined as in Supplemental Fig. S5.

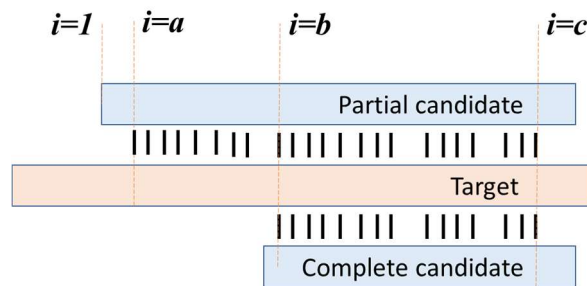

**Supplemental Figure S4.** The GeneMarkS-T gene prediction to be classified as a *5' partial gene*. Condition S1 is fulfilled. Here  $a$  and  $b$  are positions of the starts of the local alignments of respective longer and shorter protein queries, while  $c$  is the end position of the local pairwise alignments.

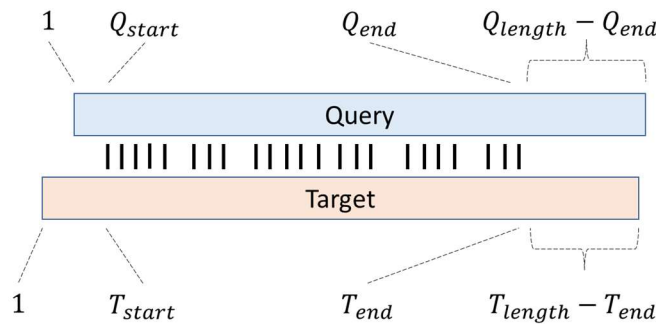

**Supplemental Figure S5.** The features used in condition S2.

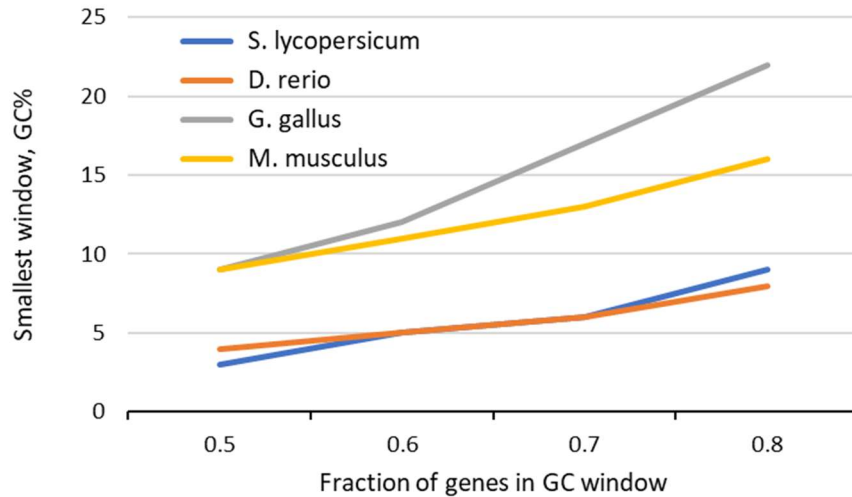

**Supplemental Figure S6.** Analysis of the genome GC content inhomogeneity. The graphs show the size of the narrowest GC% window that would contain a given amount of the annotated genes (fraction of a whole gene complement in a given genome)

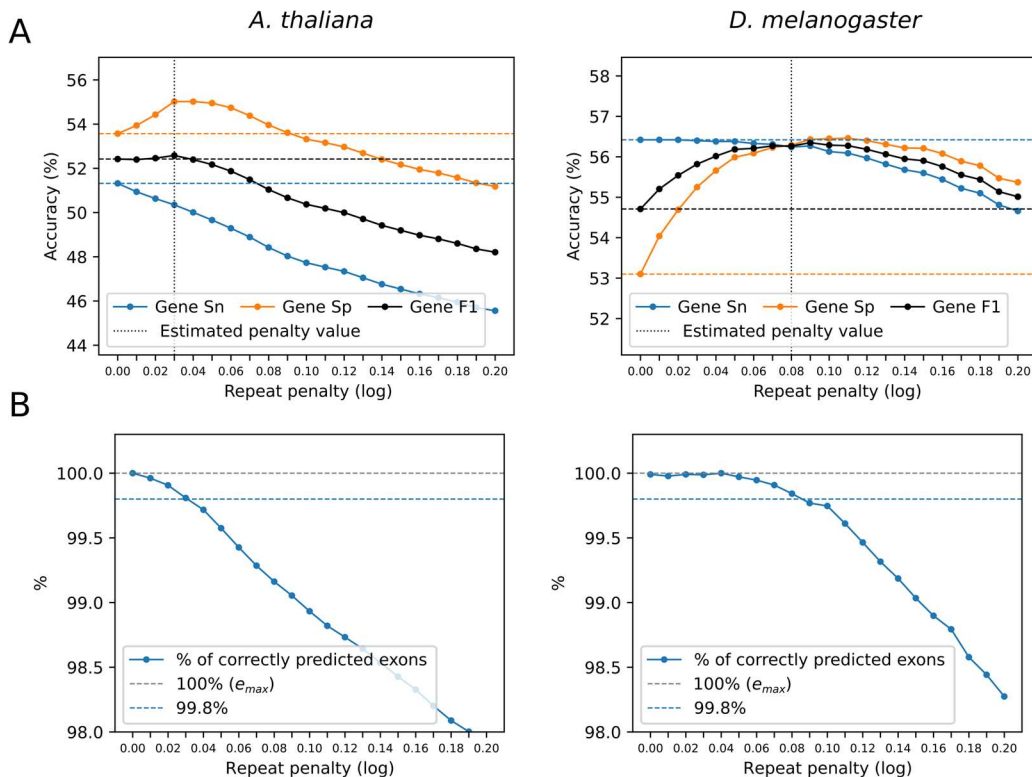

**Supplemental Figure S7. A.** Dependence of the gene level Sn, Sp and F1 values (determined for the full sets of HC genes) on the repeat penalty parameter  $q$  (natural log) for genomes of *A. thaliana* and *D. melanogaster*. **B.** Dependence of fraction (%) of correctly predicted exons of the HC genes (Sn) on the repeat penalty parameter  $q$  for the same genomes as in A. (Suppl. Materials)

## Supplemental Tables

**Supplemental Table S1** GeneMarkS-TP processing of transcript protein and genomic data. Transformation of the initially predicted genes in assembled transcripts (Section A) into a set of HC genes (Section B).

### A

| Species                | # of annotated genes | # of RNA-seq paired reads (M) | RNA-seq library size (Gb) | # of genes predicted by GeneMarkS-T | Ratio of # of GeneMarkS-T to # of annotated genes | Sn/Sp for GeneMarkS-T predictions |
|------------------------|----------------------|-------------------------------|---------------------------|-------------------------------------|---------------------------------------------------|-----------------------------------|
| <i>C. elegans</i>      | 19,969               | 132.5                         | 21.5                      | 14,746                              | 0.74                                              | 46.8 / 63.4                       |
| <i>A. thaliana</i>     | 27,445               | 63.9                          | 14.1                      | 17,589                              | 0.64                                              | 51.2 / 79.9                       |
| <i>D. melanogaster</i> | 13,951               | 58.5                          | 9.0                       | 10,163                              | 0.73                                              | 59.6 / 81.8                       |
| <i>S. lycopersicum</i> | 25,158               | 130.7                         | 30.5                      | 19,526                              | 0.78                                              | 67.8 / 77.8                       |
| <i>D. rerio</i>        | 25,611               | 75.7                          | 17.2                      | 22,992                              | 0.90                                              | 59.6 / 59.9                       |
| <i>G. gallus</i>       | 17,279               | 95.3                          | 25.3                      | 17,381                              | 1.01                                              | 49.6 / 47.0                       |
| <i>M. musculus</i>     | 22,611               | 411.1                         | 83.0                      | 15,819                              | 0.70                                              | 49.6 / 63.2                       |

### B

| Species                | # of proteins in the Order excluded DB | # of HC genes found with the Order excluded DB | Ratio of # of HC genes to # of annotated genes | Sn/Sp for predicted HC genes |
|------------------------|----------------------------------------|------------------------------------------------|------------------------------------------------|------------------------------|
| <i>C. elegans</i>      | 8,168,321                              | 8,062                                          | 0.40                                           | 35.7 / 88.4                  |
| <i>A. thaliana</i>     | 3,160,482                              | 16,008                                         | 0.58                                           | 55.0 / 94.7                  |
| <i>D. melanogaster</i> | 1,785,203                              | 8,109                                          | 0.58                                           | 59.6 / 81.8                  |
| <i>S. lycopersicum</i> | 3,116,328                              | 17,231                                         | 0.68                                           | 74.9 / 95.2                  |
| <i>D. rerio</i>        | 4,791,893                              | 16,918                                         | 0.66                                           | 67.0 / 88.5                  |
| <i>G. gallus</i>       | 4,933,362                              | 12,473                                         | 0.72                                           | 74.4 / 89.1                  |
| <i>M. musculus</i>     | 1,835,426                              | 13,057                                         | 0.58                                           | 63.5 / 93.2                  |

  

| Species                | # of proteins in the Species excluded DB | # of HC genes found with the Species excluded DB | Ratio of # of HC genes to # of annotated genes | Sn/Sp for predicted HC genes |
|------------------------|------------------------------------------|--------------------------------------------------|------------------------------------------------|------------------------------|
| <i>C. elegans</i>      | 8,245,445                                | 11,399                                           | 0.57                                           | 51.7 / 90.6                  |
| <i>A. thaliana</i>     | 3,483,291                                | 16,551                                           | 0.60                                           | 58.8 / 97.6                  |
| <i>D. melanogaster</i> | 2,588,444                                | 9,223                                            | 0.66                                           | 63.7 / 96.3                  |
| <i>S. lycopersicum</i> | 3,456,742                                | 17,489                                           | 0.70                                           | 75.8 / 95.1                  |
| <i>D. rerio</i>        | 4,973,735                                | 16,573                                           | 0.65                                           | 66.9 / 90.4                  |
| <i>G. gallus</i>       | 4,984,020                                | 12,564                                           | 0.73                                           | 74.0 / 88.4                  |
| <i>M. musculus</i>     | 2,228,727                                | 12,965                                           | 0.57                                           | 63.9 / 94.5                  |

**Supplemental Table S2.** Distribution of the predicted exons among four categories of extrinsic support. Average Specificity values (exon level) are given for each category. Descriptions of the smaller and larger protein databases compiled for each species are given in Methods.

| Species                | Intermediate set of gene predictions | Smaller protein DB |                | Larger protein DB |                |
|------------------------|--------------------------------------|--------------------|----------------|-------------------|----------------|
|                        |                                      | # of exons         | Specificity, % | # of exons        | Specificity, % |
| <i>C. elegans</i>      | Fully extrinsic                      | 53,534             | 97.2           | 74,548            | 97.3           |
|                        | Partially extrinsic                  | 38,696             | 88.4           | 37,472            | 86.2           |
|                        | With extrinsic match                 | 21,962             | 83.8           | 7,279             | 74.3           |
|                        | With no extrinsic match              | 4,769              | 54.5           | 2,286             | 37.2           |
| <i>A. thaliana</i>     | Fully extrinsic                      | 102,615            | 98.8           | 108,633           | 98.8           |
|                        | Partially extrinsic                  | 25,406             | 85.2           | 26,650            | 77.4           |
|                        | With extrinsic match                 | 6,538              | 63.5           | 4,759             | 37.6           |
|                        | With no extrinsic match              | 7,384              | 24.7           | 2,829             | 11.5           |
| <i>D. melanogaster</i> | Fully extrinsic                      | 35,300             | 97.7           | 42,821            | 97.7           |
|                        | Partially extrinsic                  | 12,443             | 82.2           | 11,455            | 76.9           |
|                        | With extrinsic match                 | 3,175              | 76.3           | 329               | 52.9           |
|                        | With no extrinsic match              | 2,766              | 36.3           | 1,084             | 9.4            |
| <i>S. lycopersicum</i> | Fully extrinsic                      | 108,024            | 98.4           | 110,645           | 98.3           |
|                        | Partially extrinsic                  | 25,610             | 75.6           | 26,784            | 72.0           |
|                        | With extrinsic match                 | 5,507              | 59.5           | 4,893             | 47.3           |
|                        | With no extrinsic match              | 11,112             | 17.0           | 8,799             | 12.5           |
| <i>D. rerio</i>        | Fully extrinsic                      | 156,781            | 97.6           | 156,506           | 98.1           |
|                        | Partially extrinsic                  | 102,256            | 70.6           | 105,941           | 69.8           |
|                        | With extrinsic match                 | 9,398              | 34.4           | 7,360             | 27.4           |
|                        | With no extrinsic match              | 43,023             | 2.5            | 40,983            | 1.9            |
| <i>G. gallus</i>       | Fully extrinsic                      | 129,144            | 98.2           | 126,410           | 98.2           |
|                        | Partially extrinsic                  | 50,046             | 75.1           | 53,784            | 75.2           |
|                        | With extrinsic match                 | 2,968              | 31.2           | 3,008             | 25.4           |
|                        | With no extrinsic match              | 33,168             | 0.7            | 33,111            | 0.6            |
| <i>M. musculus</i>     | Fully extrinsic                      | 141,520            | 99.1           | 143,186           | 99.3           |
|                        | Partially extrinsic                  | 55,236             | 73.0           | 55,394            | 72.5           |
|                        | With extrinsic match                 | 5,202              | 49.8           | 5,063             | 43.1           |
|                        | With no extrinsic match              | 61,229             | 2.1            | 58,337            | 1.2            |



**Supplemental Table S3.** Gene and exon level prediction accuracy of GeneMark-ETP with and without filtering of gene predictions with no extrinsic match. The larger F1 values are shown in bold. The gene predictions with no extrinsic match were removed from the GeneMark-ETP outputs for genomes longer than 300 Mbp (the bottom four genomes). For each species, the results are shown for the smaller (order excluded) and larger (species excluded) databases of reference proteins.

|                        |         | Smaller protein DB           |             | Larger protein DB            |             |
|------------------------|---------|------------------------------|-------------|------------------------------|-------------|
|                        |         | All intermediate predictions | Output      | All intermediate predictions | Output      |
| <i>C. elegans</i>      | Gene Sn | 60.4                         | 58.7        | 68.4                         | 67.7        |
|                        | Gene Sp | 67.7                         | 71.1        | 73.8                         | 76.2        |
|                        | Gene F1 | 63.8                         | <b>64.3</b> | 71.0                         | <b>71.7</b> |
|                        | Exon Sn | 82.9                         | 80.9        | 85.9                         | 85.3        |
|                        | Exon Sp | 90.1                         | 91.6        | 91.4                         | 92.4        |
|                        | Exon F1 | <b>86.4</b>                  | 86.0        | 88.6                         | <b>88.7</b> |
| <i>A. thaliana</i>     | Gene Sn | 75.8                         | 72.8        | 77.9                         | 77.5        |
|                        | Gene Sp | 80.0                         | 86.7        | 81.0                         | 84.2        |
|                        | Gene F1 | 77.8                         | <b>79.1</b> | 79.4                         | <b>80.7</b> |
|                        | Exon Sn | 82.3                         | 81.1        | 82.9                         | 82.7        |
|                        | Exon Sp | 90.9                         | 94.6        | 91.0                         | 92.6        |
|                        | Exon F1 | 86.4                         | <b>87.3</b> | 86.8                         | <b>87.4</b> |
| <i>D. melanogaster</i> | Gene Sn | 71.5                         | 67.4        | 78.9                         | 78.4        |
|                        | Gene Sp | 77.9                         | 82.3        | 83.1                         | 85.0        |
|                        | Gene F1 | <b>74.6</b>                  | 74.1        | 80.9                         | <b>81.6</b> |
|                        | Exon Sn | 76.4                         | 74.8        | 80.7                         | 80.6        |
|                        | Exon Sp | 89.7                         | 92.6        | 91.4                         | 93.0        |
|                        | Exon F1 | 82.5                         | <b>82.7</b> | 85.7                         | <b>86.4</b> |
| <i>S. lycopersicum</i> | Gene Sn | 89.5                         | 88.2        | 90.6                         | 90.2        |
|                        | Gene Sp | 70.6                         | 81.4        | 70.9                         | 79.8        |
|                        | Gene F1 | 78.9                         | <b>84.7</b> | 79.5                         | <b>84.6</b> |
|                        | Exon Sn | 97.1                         | 96.7        | 97.4                         | 97.2        |
|                        | Exon Sp | 87.1                         | 92.6        | 87.0                         | 91.6        |
|                        | Exon F1 | 91.8                         | <b>94.6</b> | 91.9                         | <b>94.3</b> |
| <i>D. rerio</i>        | Gene Sn | 72.9                         | 72.7        | 73.8                         | 73.8        |
|                        | Gene Sp | 39.4                         | 56.5        | 40.3                         | 56.8        |
|                        | Gene F1 | 51.2                         | <b>63.6</b> | 52.2                         | <b>64.2</b> |
|                        | Exon Sn | 93.9                         | 93.6        | 94.2                         | 94.0        |
|                        | Exon Sp | 73.7                         | 85.1        | 74.1                         | 85.1        |
|                        | Exon F1 | 82.5                         | <b>89.2</b> | 82.9                         | <b>89.3</b> |
| <i>G. gallus</i>       | Gene Sn | 78.1                         | 78.0        | 77.5                         | 77.5        |
|                        | Gene Sp | 40.7                         | 67.2        | 40.0                         | 65.9        |
|                        | Gene F1 | 53.5                         | <b>72.2</b> | 52.8                         | <b>71.2</b> |
|                        | Exon Sn | 95.5                         | 95.4        | 95.4                         | 95.4        |
|                        | Exon Sp | 76.9                         | 90.7        | 76.5                         | 90.3        |
|                        | Exon F1 | 85.2                         | <b>93.0</b> | 85.0                         | <b>92.8</b> |
| <i>M. musculus</i>     | Gene Sn | 71.7                         | 71.3        | 72.8                         | 72.7        |
|                        | Gene Sp | 34.5                         | 66.0        | 35.3                         | 65.9        |
|                        | Gene F1 | 46.5                         | <b>68.6</b> | 47.6                         | <b>69.1</b> |
|                        | Exon Sn | 91.6                         | 91.2        | 92.0                         | 91.7        |
|                        | Exon Sp | 70.1                         | 90.7        | 70.7                         | 90.7        |
|                        | Exon F1 | 79.4                         | <b>91.0</b> | 79.9                         | <b>91.2</b> |

**Supplemental Table S4.** Gene- and exon-level prediction accuracy of the *ab initio* GeneMark-ES, the RNA-Seq-based GeneMark-ET, the protein-based GeneMark-EP+, and GeneMark-ETP. The accuracy estimates are shown for the smaller (order excluded) and for the larger (species excluded) protein databases (see Data Sets section).

|                        |         | ES   | ET   | Smaller protein DB |             | Larger protein DB |             |
|------------------------|---------|------|------|--------------------|-------------|-------------------|-------------|
|                        |         |      |      | EP+                | ETP         | EP+               | ETP         |
| <i>C. elegans</i>      | Gene Sn | 48.2 | 48.9 | 48.5               | <b>60.4</b> | 55.2              | <b>68.4</b> |
|                        | Gene Sp | 47.9 | 48.8 | 46.8               | <b>67.7</b> | 53.8              | <b>73.8</b> |
|                        | Gene F1 | 48.0 | 48.8 | 47.6               | <b>63.8</b> | 54.5              | <b>71.0</b> |
|                        | Exon Sn | 81.8 | 81.7 | 81.1               | <b>82.9</b> | 83.3              | <b>85.9</b> |
|                        | Exon Sp | 83.1 | 83.7 | 82.0               | <b>90.1</b> | 84.9              | <b>91.4</b> |
|                        | Exon F1 | 82.5 | 82.7 | 81.5               | <b>86.4</b> | 84.1              | <b>88.6</b> |
| <i>A. thaliana</i>     | Gene Sn | 55.8 | 57.1 | 66.6               | <b>75.8</b> | 73.4              | <b>77.9</b> |
|                        | Gene Sp | 55.9 | 57.3 | 65.9               | <b>80.0</b> | 71.5              | <b>81.0</b> |
|                        | Gene F1 | 55.9 | 57.2 | 66.3               | <b>77.8</b> | 72.4              | <b>79.4</b> |
|                        | Exon Sn | 76.9 | 77.1 | 79.8               | <b>82.3</b> | 81.5              | <b>82.9</b> |
|                        | Exon Sp | 80.8 | 82.1 | 84.9               | <b>90.9</b> | 86.3              | <b>91.0</b> |
|                        | Exon F1 | 78.8 | 79.5 | 82.3               | <b>86.4</b> | 83.8              | <b>86.8</b> |
| <i>D. melanogaster</i> | Gene Sn | 51.2 | 53.3 | 56.5               | <b>71.5</b> | 69.9              | <b>78.9</b> |
|                        | Gene Sp | 48.5 | 49.7 | 53.9               | <b>77.9</b> | 63.5              | <b>83.1</b> |
|                        | Gene F1 | 49.8 | 51.4 | 55.1               | <b>74.6</b> | 66.5              | <b>80.9</b> |
|                        | Exon Sn | 67.8 | 68.6 | 70.2               | <b>76.4</b> | 76.5              | <b>80.7</b> |
|                        | Exon Sp | 72.8 | 74.2 | 77.3               | <b>89.7</b> | 81.1              | <b>91.4</b> |
|                        | Exon F1 | 70.2 | 71.3 | 73.6               | <b>82.5</b> | 78.8              | <b>85.7</b> |
| <i>S. lycopersicum</i> | Gene Sn |      | 47.2 | 67.0               | <b>88.2</b> | 72.7              | <b>90.2</b> |
|                        | Gene Sp |      | 37.4 | 51.3               | <b>81.4</b> | 54.8              | <b>79.8</b> |
|                        | Gene F1 |      | 41.7 | 58.1               | <b>84.7</b> | 62.5              | <b>84.6</b> |
|                        | Exon Sn |      | 83.5 | 90.5               | <b>96.7</b> | 92.1              | <b>97.2</b> |
|                        | Exon Sp |      | 74.2 | 80.0               | <b>92.6</b> | 80.7              | <b>91.6</b> |
|                        | Exon F1 |      | 78.6 | 84.9               | <b>94.6</b> | 86.0              | <b>94.3</b> |
| <i>D. rerio</i>        | Gene Sn |      | 20.4 | 35.7               | <b>72.7</b> | 39.6              | <b>73.8</b> |
|                        | Gene Sp |      | 7.5  | 13.3               | <b>56.5</b> | 14.7              | <b>56.8</b> |
|                        | Gene F1 |      | 11.0 | 19.4               | <b>63.6</b> | 21.4              | <b>64.2</b> |
|                        | Exon Sn |      | 79.1 | 84.9               | <b>93.6</b> | 86.2              | <b>94.0</b> |
|                        | Exon Sp |      | 50.3 | 55.9               | <b>85.1</b> | 56.5              | <b>85.1</b> |
|                        | Exon F1 |      | 61.5 | 67.4               | <b>89.2</b> | 68.2              | <b>89.3</b> |
| <i>G. gallus</i>       | Gene Sn |      | 2.4  | 14.1               | <b>78.0</b> | 14.4              | <b>77.5</b> |
|                        | Gene Sp |      | 1.4  | 11.3               | <b>67.2</b> | 11.6              | <b>65.9</b> |
|                        | Gene F1 |      | 1.8  | 12.6               | <b>72.2</b> | 12.9              | <b>71.2</b> |
|                        | Exon Sn |      | 15.1 | 28.7               | <b>95.4</b> | 29.0              | <b>95.4</b> |
|                        | Exon Sp |      | 27.0 | 53.4               | <b>90.7</b> | 53.8              | <b>90.3</b> |
|                        | Exon F1 |      | 19.3 | 37.3               | <b>93.0</b> | 37.7              | <b>92.8</b> |
| <i>M. musculus</i>     | Gene Sn |      | 7.8  | 22.0               | <b>71.3</b> | 23.7              | <b>72.7</b> |
|                        | Gene Sp |      | 5.4  | 15.0               | <b>66.0</b> | 16.0              | <b>65.9</b> |
|                        | Gene F1 |      | 6.4  | 17.8               | <b>68.6</b> | 19.1              | <b>69.1</b> |
|                        | Exon Sn |      | 49.7 | 57.3               | <b>91.2</b> | 58.1              | <b>91.7</b> |
|                        | Exon Sp |      | 50.9 | 64.2               | <b>90.7</b> | 64.8              | <b>90.7</b> |
|                        | Exon F1 |      | 50.3 | 60.6               | <b>91.0</b> | 61.3              | <b>91.2</b> |

**Supplemental Table S5.** Comparison of gene- and exon-level prediction accuracy between RNA-seq-based BRAKER1, protein-based BRAKER2, TSEBRA (a tool combining BRAKER1 and BRAKER2), and GeneMark-ETP. Note that the low accuracy in genomes of *G. gallus* and *M. musculus* observed for BRAKER1, BRAKER2, and TSEBRA could be explained in part by the use of a single statistical model for the genome-wide gene prediction rather than the use of the local GC-specific models as in GeneMark-ETP.

|                        |         | BRAKER1     | Smaller protein DB |             |             | Larger protein DB |             |             |
|------------------------|---------|-------------|--------------------|-------------|-------------|-------------------|-------------|-------------|
|                        |         |             | BRAKER2            | TSEBRA      | ETP         | BRAKER2           | TSEBRA      | ETP         |
| <i>C. elegans</i>      | Gene Sn | <b>61.8</b> | 46.8               | 60.3        | 60.4        | 69.0              | <b>71.1</b> | 68.4        |
|                        | Gene Sp | 65.6        | 54.1               | <b>77.5</b> | 67.7        | 70.1              | <b>80.5</b> | 73.8        |
|                        | Gene F1 | 63.6        | 50.2               | <b>67.8</b> | 63.8        | 69.6              | <b>75.5</b> | 71.0        |
|                        | Exon Sn | <b>85.0</b> | 74.0               | 76.6        | 82.9        | 84.8              | 83.9        | <b>85.9</b> |
|                        | Exon Sp | 88.5        | 87.8               | <b>93.4</b> | 90.1        | 91.5              | <b>93.8</b> | 91.4        |
|                        | Exon F1 | <b>86.7</b> | 80.3               | 84.2        | 86.4        | 88.0              | <b>88.6</b> | <b>88.6</b> |
| <i>A. thaliana</i>     | Gene Sn | 59.6        | 72.6               | 73.6        | <b>75.8</b> | 79.2              | <b>79.3</b> | 77.9        |
|                        | Gene Sp | 61.3        | 70.1               | <b>81.2</b> | 80.0        | 75.6              | <b>82.8</b> | 81.0        |
|                        | Gene F1 | 60.4        | 71.3               | 77.2        | <b>77.8</b> | 77.4              | <b>81.0</b> | 79.4        |
|                        | Exon Sn | 78.3        | 81.0               | 79.6        | <b>82.3</b> | 83.1              | 82.7        | <b>82.9</b> |
|                        | Exon Sp | 82.5        | 88.4               | <b>93.7</b> | 90.9        | 88.2              | <b>93.2</b> | 91.0        |
|                        | Exon F1 | 80.4        | 84.5               | 86.1        | <b>86.4</b> | 85.6              | <b>87.6</b> | 86.8        |
| <i>D. melanogaster</i> | Gene Sn | 63.8        | 61.1               | 68.0        | <b>71.5</b> | 78.9              | <b>80.0</b> | 78.9        |
|                        | Gene Sp | 62.3        | 60.9               | 75.4        | <b>77.9</b> | 73.6              | 80.9        | <b>83.1</b> |
|                        | Gene F1 | 63.0        | 61.0               | 71.5        | <b>74.6</b> | 76.1              | 80.4        | <b>80.9</b> |
|                        | Exon Sn | <b>77.0</b> | 71.4               | 72.1        | 76.4        | 80.1              | 79.8        | <b>80.7</b> |
|                        | Exon Sp | 80.9        | 83.4               | <b>89.9</b> | 89.7        | 88.5              | <b>92.2</b> | 91.4        |
|                        | Exon F1 | 78.9        | 76.9               | 80.0        | <b>82.5</b> | 84.1              | 85.6        | <b>85.7</b> |
| <i>S. lycopersicum</i> | Gene Sn | 61.8        | 79.6               | 82.5        | <b>88.2</b> | 84.2              | 85.4        | <b>90.2</b> |
|                        | Gene Sp | 47.1        | 56.5               | 71.3        | <b>81.4</b> | 58.9              | 72.1        | <b>79.8</b> |
|                        | Gene F1 | 53.5        | 66.1               | 76.5        | <b>84.7</b> | 69.3              | 78.2        | <b>84.6</b> |
|                        | Exon Sn | 90.7        | 94.2               | 94.9        | <b>96.7</b> | 95.4              | 96.1        | <b>97.2</b> |
|                        | Exon Sp | 75.5        | 82.8               | 90.3        | <b>92.6</b> | 82.3              | 90.2        | <b>91.6</b> |
|                        | Exon F1 | 82.4        | 88.1               | 92.5        | <b>94.6</b> | 88.4              | 93.0        | <b>94.3</b> |
| <i>D. rerio</i>        | Gene Sn | 51.7        | 55.0               | 66.9        | <b>72.7</b> | 57.8              | 69.0        | <b>73.8</b> |
|                        | Gene Sp | 28.1        | 29.5               | 45.7        | <b>56.5</b> | 27.9              | 46.0        | <b>56.8</b> |
|                        | Gene F1 | 36.4        | 38.4               | 54.3        | <b>63.6</b> | 37.6              | 55.2        | <b>64.2</b> |
|                        | Exon Sn | 91.1        | 88.0               | 89.4        | <b>93.6</b> | 89.4              | 90.1        | <b>94.0</b> |
|                        | Exon Sp | 75.4        | 78.9               | <b>87.2</b> | 85.1        | 76.2              | <b>86.8</b> | 85.1        |
|                        | Exon F1 | 82.5        | 83.2               | 88.3        | <b>89.2</b> | 82.2              | 88.4        | <b>89.3</b> |
| <i>G. gallus</i>       | Gene Sn | 6.6         | 25.2               | 26.7        | <b>78.0</b> | 27.2              | 28.3        | <b>77.5</b> |
|                        | Gene Sp | 3.5         | 16.6               | 22.2        | <b>67.2</b> | 18.1              | 23.3        | <b>65.9</b> |
|                        | Gene F1 | 4.6         | 20.0               | 24.2        | <b>72.2</b> | 21.7              | 25.6        | <b>71.2</b> |
|                        | Exon Sn | 66.1        | 35.0               | 59.8        | <b>95.4</b> | 35.3              | 60.0        | <b>95.4</b> |
|                        | Exon Sp | 48.1        | 59.2               | 74.4        | <b>90.7</b> | 60.6              | 74.4        | <b>90.3</b> |
|                        | Exon F1 | 55.7        | 44.0               | 66.3        | <b>93.0</b> | 44.6              | 66.4        | <b>92.8</b> |
| <i>M. musculus</i>     | Gene Sn | 27.8        | 32.5               | 44.2        | <b>71.3</b> | 35.9              | 46.7        | <b>72.7</b> |
|                        | Gene Sp | 14.8        | 21.2               | 31.3        | <b>66.0</b> | 23.2              | 32.7        | <b>65.9</b> |
|                        | Gene F1 | 19.3        | 25.7               | 36.7        | <b>68.6</b> | 28.2              | 38.5        | <b>69.1</b> |
|                        | Exon Sn | 83.9        | 57.6               | 77.4        | <b>91.2</b> | 59.3              | 78.1        | <b>91.7</b> |
|                        | Exon Sp | 67.5        | 71.6               | 83.3        | <b>90.7</b> | 72.7              | 83.5        | <b>90.7</b> |
|                        | Exon F1 | 74.8        | 63.8               | 80.2        | <b>91.0</b> | 65.3              | 80.7        | <b>91.2</b> |

**Supplemental Table S6.** Performance of MAKER2 and GeneMark-ETP on the genomes of the three model species. The results shown for MAKER2 are supposed to give upper bounds with respect to the freedom of choosing the methods of MAKER2 training. The protein databases are described in Section S3 of Suppl. Materials.

|      |    | <i>D. melanogaster</i> |              | <i>D. rerio</i> |              | <i>M. musculus</i> |              |
|------|----|------------------------|--------------|-----------------|--------------|--------------------|--------------|
|      |    | MAKER2                 | GeneMark-ETP | MAKER2          | GeneMark-ETP | MAKER2             | GeneMark-ETP |
| exon | Sn | 75.2                   | <b>80.7</b>  | 83.3            | <b>93.9</b>  | 79.2               | <b>91.7</b>  |
|      | Sp | 74.0                   | <b>91.4</b>  | 79.2            | <b>84.9</b>  | 77.4               | <b>87.9</b>  |
|      | F1 | 74.6                   | <b>85.7</b>  | 81.2            | <b>89.2</b>  | 78.3               | <b>89.8</b>  |
| gene | Sn | 60.2                   | <b>79.0</b>  | 47.7            | <b>73.5</b>  | 41.6               | <b>73.1</b>  |
|      | Sp | 55.3                   | <b>83.0</b>  | 37.6            | <b>56.2</b>  | 34.8               | <b>59.7</b>  |
|      | F1 | 57.7                   | <b>81.0</b>  | 42.0            | <b>63.7</b>  | 37.9               | <b>65.7</b>  |

**Supplemental Table S7.** Genomic sequences and annotations used in the tests. A date in parenthesis is the date of the last update prior to the data use.

| Species                | Assembly version | Main annotation                    | Supplementary annotation*     |
|------------------------|------------------|------------------------------------|-------------------------------|
| <i>C. elegans</i>      | GCF_000002985.6  | Wormbase WS284 (Feb 2022)          | -                             |
| <i>A. thaliana</i>     | GCF_000001735.4  | Araport11 (Mar 2021)               | -                             |
| <i>D. melanogaster</i> | GCF_000001215.4  | FlyBase r6.44 (Feb 2022)           | -                             |
| <i>S. lycopersicum</i> | GCF_000188115.4  | NCBI annot. Release 103 (Jun 2019) | ITAG3.2 (Jun 2017)            |
| <i>D. rerio</i>        | GCF_000002035.6  | NCBI annot. Release 106 (Oct 2019) | Ensembl GRCz11.105 (Oct 2021) |
| <i>G. gallus</i>       | GCF_000002315.6  | NCBI annot. Release 104 (Mar 2020) | Ensembl GRCg6a.105 (Oct 2021) |
| <i>M. musculus</i>     | GCF_000001635.27 | GENCODE M28 (Dec 2021)             | RefSeq**                      |

\*Supplementary annotation was used to produce the ‘set of reliable genes’ by comparison of two annotations and selecting identically annotated genes. \*\*The subset for *M. musculus* genes identical between Ensemble and NCBI was selected by choosing a subset of the GENCODE transcripts with the following attributes: *CCDS* (Agreement with the RefSeq annotation), *transcript\_support\_level=1* (All splice junctions of the transcript were supported by at least one non-suspect mRNA), and *basic* (prioritizes full-length protein-coding transcripts over partial or non-protein-coding transcripts within the same gene).

**Supplemental Table S8:** Selection of proteins from OrthoDB v10.1. Numbers in bold black font show the number of species in the largest OrthoDB segment, IP<sub>0</sub>, considered for a given species. Numbers in bold blue font show the number of species excluded from IP<sub>0</sub> in the ‘Order excluded’ segment of OrthoDB. The ‘Species excluded’ segment of OrthoDB constitutes proteins in IP<sub>0</sub> but those from the species of interest itself.

| Species                | # of species in the OrthoDB clade |        |           |            |            |            | Name of the OrthoDB segment | # of proteins in the OrthoDB segment (M) |
|------------------------|-----------------------------------|--------|-----------|------------|------------|------------|-----------------------------|------------------------------------------|
|                        | Genus                             | Family | Order     | Class      | Phylum     | Kingdom    |                             |                                          |
| <i>C. elegans</i>      | 3                                 | 3      | <b>5</b>  | 6          | 7          | <b>448</b> | Metazoa                     | 8.3                                      |
| <i>A. thaliana</i>     | 2                                 | 8      | <b>10</b> | -          | 100        | <b>117</b> | Plantae                     | 3.5                                      |
| <i>D. melanogaster</i> | 20                                | 20     | <b>56</b> | 148        | <b>170</b> | -          | Arthropoda                  | 2.6                                      |
| <i>S. lycopersicum</i> | 2                                 | 10     | <b>11</b> | -          | 100        | <b>117</b> | Plantae                     | 3.5                                      |
| <i>D. rerio</i>        | 1                                 | 5      | <b>5</b>  | 50         | <b>246</b> | -          | Chordata                    | 5.0                                      |
| <i>G. gallus</i>       | 1                                 | 3      | <b>4</b>  | 62         | <b>246</b> | -          | Chordata                    | 5.0                                      |
| <i>M. musculus</i>     | 3                                 | 5      | <b>20</b> | <b>111</b> | -          | -          | Mammalia                    | 2.3                                      |

**Supplemental Table S9.** RNA-seq libraries used for computational experiments.

| Species                | RNA-seq library ID | Number of paired reads (M) | Read length (nt) | Library size (Gb) |
|------------------------|--------------------|----------------------------|------------------|-------------------|
| <i>C. elegans</i>      | SRR065717          | 29.1                       | 76               | 4.4               |
|                        | SRR065719          | 73.3                       | 76               | 11.1              |
|                        | SRR473298          | 19.9                       | 100              | 4.0               |
|                        | SRR2054452         | 10.2                       | 100              | 2.0               |
|                        | Total              | 132.5                      |                  | 21.5              |
| <i>A. thaliana</i>     | SRR934391          | 20.0                       | 101              | 4.0               |
|                        | SRR5588566         | 24.7                       | 125              | 6.2               |
|                        | SRR7169927         | 19.2                       | 101              | 3.9               |
|                        | Total              | 63.9                       |                  | 14.1              |
| <i>D. melanogaster</i> | SRR023505          | 8.4                        | 76               | 1.3               |
|                        | SRR023546          | 8.9                        | 76               | 1.4               |
|                        | SRR023608          | 11.9                       | 76               | 1.8               |
|                        | SRR026433          | 22.1                       | 76               | 3.4               |
|                        | SRR027108          | 7.2                        | 76               | 1.1               |
|                        | Total              | 58.5                       |                  | 9.0               |
| <i>S. lycopersicum</i> | SRR2002284         | 56.2                       | 73               | 8.2               |
|                        | SRR7959012         | 25.4                       | 149              | 7.6               |
|                        | SRR7959019         | 27.9                       | 149              | 8.3               |
|                        | SRR14055940        | 21.2                       | 150              | 6.4               |
|                        | Total              | 130.7                      |                  | 30.5              |
| <i>D. rerio</i>        | SRR9735169         | 28.2                       | 75               | 4.2               |
|                        | SRR10004226        | 21.6                       | 150              | 6.5               |
|                        | SRR10040127        | 25.9                       | 126              | 6.5               |
|                        | Total              | 75.7                       |                  | 17.2              |
| <i>G. gallus</i>       | ERR2812450         | 44.9                       | 150              | 13.5              |
|                        | SRR3971633         | 24.0                       | 100              | 4.8               |
|                        | SRR6337028         | 10.0                       | 100              | 2.0               |
|                        | SRR11038071        | 16.4                       | 151              | 5.0               |
|                        | Total              | 95.3                       |                  | 25.3              |
| <i>M. musculus</i>     | SRR567480          | 155.7                      | 101              | 31.5              |
|                        | SRR567482          | 161.1                      | 101              | 32.5              |
|                        | SRR567497          | 94.3                       | 101              | 19.0              |
|                        | Total              | 411.1                      |                  | 83.0              |

**Supplemental Table S10.** Numbers of GeneMark-ETP predicted genes and transcripts including alternative transcripts.

| Species                | GeneMark-ETP with order excluded DB |                      |                        | Reference annotation statistics |                      |                  |
|------------------------|-------------------------------------|----------------------|------------------------|---------------------------------|----------------------|------------------|
|                        | # coding genes                      | # coding transcripts | introns per transcript | # coding genes                  | # coding transcripts | introns per gene |
| <i>C. elegans</i>      | 18,820                              | 19,806               | 5.4                    | 19,969                          | 28,544               | 4.8              |
| <i>A. thaliana</i>     | 26,449                              | 27,708               | 4.2                    | 27,445                          | 40,827               | 4.0              |
| <i>D. melanogaster</i> | 12,850                              | 14,138               | 2.9                    | 13,951                          | 22,395               | 2.8              |
| <i>S. lycopersicum</i> | 24,420                              | 26,341               | 4.3                    | 25,158                          | 31,911               | 4.4              |
| <i>D. rerio</i>        | 28,608                              | 31,961               | 7.5                    | 25,610                          | 42,929               | 8.4              |
| <i>G. gallus</i>       | 17,275                              | 21,433               | 7.7                    | 17,279                          | 38,534               | 9.0              |
| <i>M. musculus</i>     | 23,956                              | 27,686               | 6.7                    | 22,405                          | 58,318               | 6.0              |

**Supplemental Table S11.** Analysis of the correctness of the results of *re-classification* of the GeneMarkS-T predicted genes as complete/partial conducted by comparison with annotation. The genes used in this analysis were i/ predicted partial (incomplete) by GeneMarkS-T, ii/ had correctly predicted stop codon, and iii/ were verified for absence of assembly errors. The results are shown for the smaller protein database (Order excluded) and for the larger one (Species excluded) (see Data Sets in Main text).

|                        |                        | Smaller protein DB           |               |              | Larger protein DB |               |              |
|------------------------|------------------------|------------------------------|---------------|--------------|-------------------|---------------|--------------|
|                        |                        | Total incomplete predictions | True Complete | True Partial | Total incomplete  | True Complete | True Partial |
| <i>C. elegans</i>      | Re-classified complete | 2,095                        | 1,488         | 127          | 2,924             | 1,982         | 78           |
|                        | Re-classified partial  |                              | 273           | 207          |                   | 393           | 471          |
| <i>A. thaliana</i>     | Re-classified complete | 1,841                        | 1,476         | 55           | 1,878             | 1,442         | 22           |
|                        | Re-classified partial  |                              | 107           | 203          |                   | 165           | 249          |
| <i>D. melanogaster</i> | Re-classified complete | 651                          | 273           | 76           | 826               | 299           | 9            |
|                        | Re-classified partial  |                              | 48            | 254          |                   | 130           | 388          |
| <i>S. lycopersicum</i> | Re-classified complete | 1,381                        | 897           | 81           | 1,408             | 868           | 63           |
|                        | Re-classified partial  |                              | 81            | 322          |                   | 119           | 358          |
| <i>D. rerio</i>        | Re-classified complete | 2,750                        | 1,152         | 107          | 2,803             | 1,052         | 69           |
|                        | Re-classified partial  |                              | 249           | 1,242        |                   | 364           | 1,318        |
| <i>G. gallus</i>       | Re-classified complete | 4,727                        | 3,232         | 197          | 4,738             | 2,972         | 114          |
|                        | Re-classified partial  |                              | 449           | 849          |                   | 715           | 937          |
| <i>M. musculus</i>     | Re-classified complete | 2,744                        | 2,026         | 16           | 2,745             | 1,879         | 8            |
|                        | Re-classified partial  |                              | 497           | 205          |                   | 642           | 216          |

**Supplemental Table S12.** The values of Sn and Sp are determined for i/ a set of initial GeneMarkS-T predictions – complete and partial and ii/ a set of high-confidence (HC) genes, obtained with the use of Condition S1. The Sn and Sp are shown separately for the complete and partial GeneMarkS-T predictions as well as for complete and partial HC genes. The true positive prediction of a partial gene is called if the partial prediction coincides with a part of a gene in the reference annotation. The Sn and Sp of the HC genes are shown for the smaller protein database (Order excluded) and for the larger one (Species excluded) (see Data Sets). There is a significant increase in the Sp values of the partial genes that occurred in transition from the GeneMarkS-T to the HC genes. Note that for majority of the species the use of a larger protein database does not improve the Sp of the partial genes.

|                        |    | GeneMarkS-T predictions |         | HC genes (processed by GeneMarkS-TP) |         |                   |         |
|------------------------|----|-------------------------|---------|--------------------------------------|---------|-------------------|---------|
|                        |    |                         |         | Smaller protein DB                   |         | Larger protein DB |         |
|                        |    | Complete                | Partial | Complete                             | Partial | Complete          | Partial |
| <i>C. elegans</i>      | Sn | 42.9                    | 3.9     | 33.6                                 | 2.1     | 47.7              | 4.0     |
|                        | Sp | 82.0                    | 18.2    | 88.8                                 | 81.5    | 91.5              | 80.7    |
| <i>A. thaliana</i>     | Sn | 49.8                    | 1.4     | 55.6                                 | 1.1     | 57.3              | 1.6     |
|                        | Sp | 89.1                    | 17.0    | 97.4                                 | 92.3    | 97.8              | 90.8    |
| <i>D. melanogaster</i> | Sn | 56.4                    | 3.2     | 53.3                                 | 1.8     | 60.6              | 3.1     |
|                        | Sp | 87.5                    | 38.1    | 95.0                                 | 85.3    | 96.9              | 85.0    |
| <i>S. lycopersicum</i> | Sn | 66.3                    | 1.4     | 73.7                                 | 1.3     | 74.2              | 1.5     |
|                        | Sp | 84.1                    | 26.6    | 95.4                                 | 87.2    | 95.4              | 84.8    |
| <i>D. rerio</i>        | Sn | 55.3                    | 4.3     | 62.8                                 | 4.2     | 62.4              | 4.5     |
|                        | Sp | 68.4                    | 32.8    | 89.7                                 | 78.9    | 92.8              | 75.3    |
| <i>G. gallus</i>       | Sn | 43.9                    | 5.7     | 67.9                                 | 6.5     | 66.3              | 7.7     |
|                        | Sp | 64.0                    | 23.0    | 89.5                                 | 86.1    | 90.0              | 80.3    |
| <i>M. musculus</i>     | Sn | 48.4                    | 1.2     | 60.8                                 | 2.7     | 60.5              | 3.4     |
|                        | Sp | 80.4                    | 9.6     | 95.1                                 | 68.0    | 96.7              | 69.8    |

**Supplemental Table S13.** The values of the genome specific masking penalty parameter  $q$  (in natural logarithms). For GC-heterogeneous genomes, the optimal  $q$  value was estimated for each GC bin. Descriptions of the smaller (Order excluded) and larger (Species excluded) protein databases are given in the Data Sets section.

|                        |  | Smaller protein DB |        |      | Larger protein DB |        |      |
|------------------------|--|--------------------|--------|------|-------------------|--------|------|
| <i>C. elegans</i>      |  | 0.06               |        |      | 0.05              |        |      |
| <i>A. thaliana</i>     |  | 0.03               |        |      | 0.03              |        |      |
| <i>D. melanogaster</i> |  | 0.08               |        |      | 0.08              |        |      |
| <i>S. lycopersicum</i> |  | 0.04               |        |      | 0.04              |        |      |
| <i>D. rerio</i>        |  | 0.08               |        |      | 0.09              |        |      |
| GC                     |  | Low                | Medium | High | Low               | Medium | High |
| <i>G. gallus</i>       |  | 0.15               | 0.17   | 0.12 | 0.14              | 0.16   | 0.11 |
| <i>M. musculus</i>     |  | 0.13               | 0.14   | 0.14 | 0.14              | 0.14   | 0.14 |



## References

- Buchfink B, Xie C, Huson DH. 2015. Fast and sensitive protein alignment using DIAMOND. *Nature Methods* **12**: 59-60.
- Kozak M. 1987. An analysis of 5'-noncoding sequences from 699 vertebrate messenger RNAs. *Nucleic Acids Res* **15**: 8125-8148.
- Kozak M. 1999. Initiation of translation in prokaryotes and eukaryotes. *Gene* **234**: 187-208.
- Zhao W, He X, Hoadley KA, Parker JS, Hayes DN, Perou CM. 2014. Comparison of RNA-Seq by poly (A) capture, ribosomal RNA depletion, and DNA microarray for expression profiling. *BMC Genomics* **15**: 419.
